# Supplementary material
Source: PubMed Central journal article supplement (PMC3058045)
Supplement: NIHMS271217-supplement-Appendix_A.pdf [file NIHMS271217-supplement-Appendix_A.pdf]

## Appendix A

**Summary of Systematic Reviews of Non-pharmacological Treatments for Neuropsychiatric Symptoms (NPS) in Advanced Dementia  
2000-2008**

| <b>Systematic Reviews of Studies Examining Non-pharmacological Treatments for NPS in Dementia: References</b>                                                                                                                                               | <b># Studies reviewed</b> | <b># Studies that met criteria for the published review</b> | <b># Studies that restricted participant sample to moderately severe to severe cognitive impairment (MMSE 0-17*). Excludes single case designs.</b> |
|-------------------------------------------------------------------------------------------------------------------------------------------------------------------------------------------------------------------------------------------------------------|---------------------------|-------------------------------------------------------------|-----------------------------------------------------------------------------------------------------------------------------------------------------|
| Ayalon, L., Gum, A., Feliciano, L., and Arean, P. (2006). Effectiveness of nonpharmacological interventions for the management of neuropsychiatric symptoms in patients with dementia. <i>Archives of Internal Medicine</i> , 166, 2182-2188.               | 257                       | 9                                                           | 0                                                                                                                                                   |
| Bharani, N., and Snowden, M. (2005). Evidence-based interventions for nursing home residents with dementia-related behavioral symptoms. <i>Psychiatric Clinics of North America</i> , 28, 985-1005.                                                         | 89                        | 14 RCTs                                                     | 2<br>Camberg <i>et al.</i> (1999)<br>Kovach <i>et al.</i> (2004)                                                                                    |
| Chung, J., and Lai, C. (2002). Snoezelen for dementia. <i>Cochrane Database of Systematic Reviews</i> , Issue 4. Art. No.: CD003152. DOI: 10.1002/14651858. CD003152.                                                                                       | 16                        | 2 RCTs                                                      | 2<br>Baker <i>et al.</i> (2001)<br>Baker <i>et al.</i> (2003)**                                                                                     |
| Cohen-Mansfield, J. (2001). Nonpharmacologic interventions for inappropriate behaviors in dementia. <i>American Journal of Geriatric Psychiatry</i> , 9, 361-381.                                                                                           | Not reported              | 83                                                          | 0                                                                                                                                                   |
| Eggermont, L and Scherder, E. (2006). Physical activity and behavior in dementia. A review of the literature and implications for psychosocial intervention in primary care. <i>Dementia</i> , 5, 411-428.                                                  | 70                        | 27                                                          | 1<br>Heyn (2003)                                                                                                                                    |
| Finnema, E., Droses, R., Ribbe, M., and van Tilburg, W. (2000). The effects of emotion-oriented approaches in the care for persons suffering from dementia: A review of the literature. <i>International Journal of Geriatric Psychiatry</i> , 15, 141-161. | Not reported              | 24                                                          | 0                                                                                                                                                   |
| Forbes, D., Forbes, S., Morgan, D.G., Markle-Reid, M., Wood, J., and Culum, I. (2008). Physical activity programs for persons with dementia. <i>Cochrane Database of Systematic Reviews</i> , Issue 3. Art. No.: CD006489. DOI: 10.1002/14651858.           | 17                        | 4 RCTs                                                      | 1<br>Holliman <i>et al.</i> (2001)                                                                                                                  |

|                                                                                                                                                                                                                                                                                                                      |              |         |                                                                                                                                                             |
|----------------------------------------------------------------------------------------------------------------------------------------------------------------------------------------------------------------------------------------------------------------------------------------------------------------------|--------------|---------|-------------------------------------------------------------------------------------------------------------------------------------------------------------|
| CD006489.pub2.                                                                                                                                                                                                                                                                                                       |              |         |                                                                                                                                                             |
| Forbes, D., Morgan, D.G., Bangma, J., Peacock, S., and Adamson, J. (2004). Light therapy for managing sleep, behaviour, and mood disturbances in dementia. <i>Cochrane Database of Systematic Reviews</i> , Issue 2, Art. No.: CD003946. DOI: 10.1002/14651858. CD003946.pub2.                                       | Not reported | 5 RCTs  | 1<br>Mishima <i>et al.</i> (1998)                                                                                                                           |
| Hansen, V., Jorgensen, T., and Ortenblad, L. (2006). Massage and touch for dementia. <i>Cochrane Database of Systematic Reviews</i> , Issue 4. Art. No.: CD004989. DOI: 10.1002/14651858.pub2.                                                                                                                       | 34           | 2 RCTs  | 0                                                                                                                                                           |
| Lancioni, G., Cuvo, A., and O'Reilly, M. (2002). Snoezelen: An overview of research with people with developmental disabilities and dementia. <i>Disability and Rehabilitation</i> , 24, 175-184.                                                                                                                    | 7            | 7       | 0                                                                                                                                                           |
| Landreville, P., Bedard, A., Verreault, R., Desrosiers, J., Champoux, N., Monette, J., et al. (2006). Non-pharmacological interventions for aggressive behavior in older adults living in long-term care facilities (structured abstract). <i>International Psychogeriatrics</i> , 18, 47-73.                        | 41           | 41      | 1<br>Ballard <i>et al.</i> (2002)                                                                                                                           |
| Livingston, G., Johnston, K., Katona, C., Paton, J., Lyketsos, C., and Old Age Task Force of the World Federation of Biological Psychiatry (2005). Systematic review of psychological approaches to the management of neuropsychiatric symptoms of dementia. <i>American Journal of Psychiatry</i> , 162, 1996-2021. | 1632         | 162     | 5<br>Baker <i>et al.</i> (2001)<br>Bellelli <i>et al.</i> (1998)<br>Camberg <i>et al.</i> (1999)<br>Frisoni <i>et al.</i> (1998)<br>Morgan & Stewart (1998) |
| Logsdon, R., McCurry, S., Teri, L. (2007). Evidence-based psychological treatments for disruptive behaviors in individuals with dementia. <i>Psychology and Aging</i> , 22, 28-36.                                                                                                                                   | 57 RCTs      | 14 RCTs | 0                                                                                                                                                           |
| Neal, M., and Barton Wright, P. (2003). Validation therapy for dementia. <i>Cochrane Database of Systematic Reviews</i> , Issue 3. Art. No.: CD001394. DOI: 10.1002/14651858. CD001394.                                                                                                                              | Not reported | 3 RCTs  | 0                                                                                                                                                           |
| Price, J.D., Hermans, D.G., and Grimley Evans, J. (2001). Subjective barriers to prevent wandering of cognitively impaired people. <i>Cochrane Database of Systematic Reviews</i> , Issue 1. Art. No.: CD001932. DOI: 10.1002/14651858. CD001932.                                                                    | 39           | 0 RCTs  | 0                                                                                                                                                           |
| Robinson, L. et al. (2007). Effectiveness and acceptability of non-pharmacological interventions to reduce wandering in dementia: a systematic review. <i>International Journal of Geriatric Psychiatry</i> , 22, 9-22.                                                                                              | 269          | 11      | 3<br>Baker <i>et al.</i> (2003)**<br>Frisoni <i>et al.</i> (1998)<br>Ballard <i>et al.</i> (2002)                                                           |

|                                                                                                                                                                                                                                                            |              |                  |                                   |
|------------------------------------------------------------------------------------------------------------------------------------------------------------------------------------------------------------------------------------------------------------|--------------|------------------|-----------------------------------|
| Spira, A., and Edelstein, B. (2006). Behavioral interventions for agitation in older adults with dementia: an evaluative review. <i>International Psychogeriatrics</i> , 18, 195-225.                                                                      | Not reported | 23               | 0                                 |
| Sung, H., and Chang, A. (2005). Use of preferred music to decrease agitated behaviours in older people with dementia: A review of the literature. <i>Journal of Clinical Nursing</i> , 14, 1133-1140.                                                      | 29           | 8                | 0                                 |
| Thorgrimsen, L., Spector, A., Wiles, A., and Orrell, M. (2003). Aroma therapy for dementia. <i>Cochrane Database of Systematic Reviews</i> , issue 3. Art. No.: CD003150. DOI: 10.1002/14651858.                                                           | 14           | 1RCT             | 1<br>Ballard <i>et al.</i> (2002) |
| Verkaik, R., van Weert, J., and Francke, A. (2005). The effects of psychosocial methods on depressed, aggressive and apathetic behaviors of people with dementia: a systematic review. <i>International Journal of Geriatric Psychiatry</i> , 20, 301-314. | 177          | 19 RCTs and CCTs | 1<br>Baker <i>et al.</i> 2001     |
| Vink, A.C., Birks, J.S., Bruinsma, M.S., Scholten, R.J.P.M. (2003). Music therapy for people with dementia. <i>Cochrane database of systematic reviews</i> , Issue 3. Art. No.: CD003477. DOI: 10.1002/12651858.CD003477.pub2.                             | 100          | 5 RCTs           | 0                                 |
| Woods, B., Spector, A., Jones, C., Orrell, M., and Davies, S. (2005). Reminiscence therapy for dementia. <i>Cochrane Database of Systematic Reviews</i> , Issue 2. Art. No.: CD001120. DOI: 10.1002/14651858. CD001120.pub2.                               | 16           | 5 RCTs           | 0                                 |

Note: Unless the review restricted inclusion to randomized controlled trials (RCTs) or controlled clinical trials (CCT), the types of studies varied and are not listed in the table. Studies using single case designs or samples with less than 10 participants are not listed. \*Tombaugh, T., and McIntyre, N. (1992). The Mini-Mental State Examination: A comprehensive review. *Journal of the American Geriatrics Society*, 40, 922-935.\*\*As part of a larger study, authors reported stratified data for group with MMSE 0-9, however they did not state the number of participants per group.
